# Supplementary material
Source: Springer Nature journal article supplement (https://www.springermedizin.de/resource/supplementary/12874_2005_142_MOESM1_ESM.pdf/9433854)
Supplement: MOESM1 [file 9433854]

5 clusters per intervention arm

( $N_{w1}=1569$ ,  $N_{w3}=1037$ ,  $N_c=485$ )

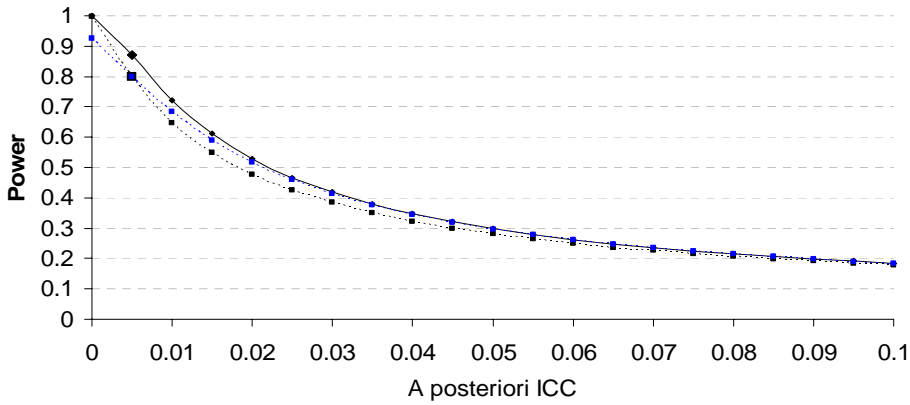

10 clusters per intervention arm

( $N_{w1}=1057$ ,  $N_{w2}=515$ ,  $N_{w3}=464$ ,  $N_c=326$ )

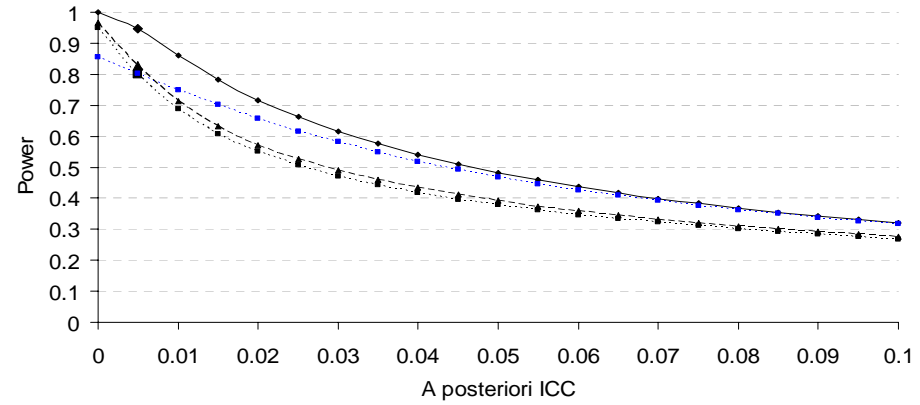

20 clusters per intervention arm

( $N_{w1}=917$ ,  $N_{w2}=336$ ,  $N_{w3}=331$ ,  $N_c=282$ )

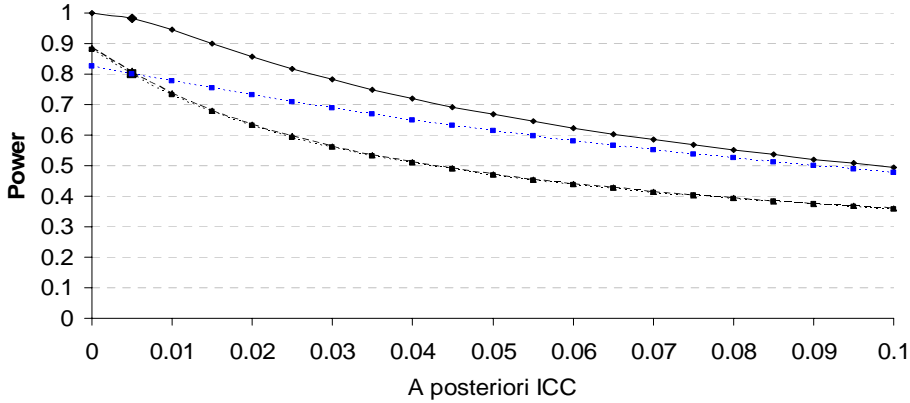

40 clusters per intervention arm

( $N_{w1}=861$ ,  $N_{w2}=287$ ,  $N_{w3}=286$ ,  $N_c=265$ )

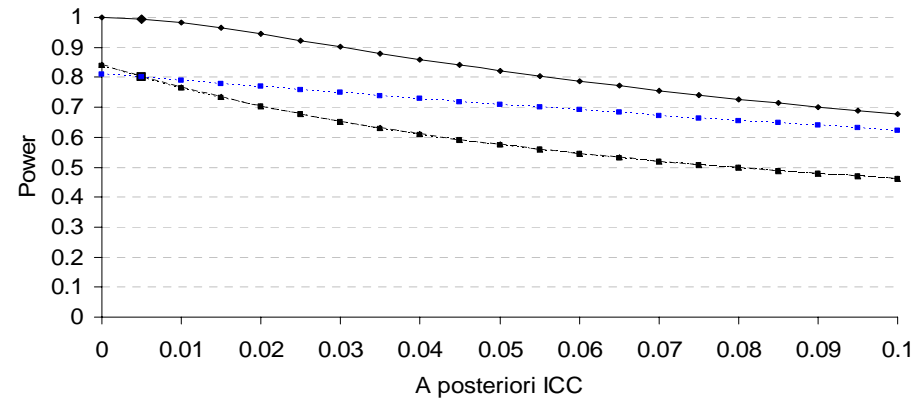

—◆— Equal weights ( $N_{w1}$ )

—■— Minimum variance weights ( $N_{w3}$ )

—▲— Cluster size weights ( $N_{w2}$ )

—■— Ref: constant size ( $N_c$ )
